# Supplementary material for: Combination of Composite Autonomic Symptom Score 31 and Heart Rate Variability for Diagnosis of Cardiovascular Autonomic Neuropathy in People with Type 2 Diabetes
Source: Hindawi journal article supplement (doi:10.1155/2020/5316769), 2020-10-30
Supplement: f1 [file 5316769.f1.pdf]

## Supplementary Information

**Table S1** Comparison of the COMPASS 31 domain scores

| COMPASS 31 domain scores | non-CAN<br>(n=60) | CAN<br>(n=43)   | <i>P</i> value |
|--------------------------|-------------------|-----------------|----------------|
| orthostatic intolerance  | 0.0 (0.0, 0.0)    | 8.0 (0.0, 12.0) | <0.001         |
| vasomotor                | 0.0 (0.0, 0.0)    | 0.0 (0.0, 1.7)  | 0.01           |
| secretomotor             | 6.4 (2.1, 8.6)    | 8.6 (4.3, 8.6)  | 0.05           |
| gastrointestinal         | 2.7 (0.9, 4.5)    | 4.5 (2.7, 7.1)  | <0.001         |
| bladder                  | 1.1 (0.0, 2.2)    | 2.2 (1.1, 3.3)  | 0.001          |
| pupillomotor             | 1.3 (0.0, 1.7)    | 1.7 (0.7, 2.3)  | 0.05           |

CAN, cardiovascular autonomic neuropathy; COMPASS 31, composite autonomic symptom score 31
